# Supplementary material for: Ecological Connectivity in Agricultural Green Infrastructure: Suggested Criteria for Fine Scale Assessment and Planning
Source: MDPI journal article supplement (doi:10.3390/land10080807), 2021-07-31
Supplement: s1 [file s1]

Archive with 1 entries (1 files):
- land-1319867-supplementary.pdf
