# Supplementary material for: Ecological Connectivity in Agricultural Green Infrastructure: Suggested Criteria for Fine Scale Assessment and Planning
Source: MDPI journal article supplement (doi:10.3390/land10080807), 2021-07-31
Supplement: s1 [file s1 › land-1319867-supplementary.pdf]

## Supplementary Material

Table S1: adopted definitions for the concepts of ecosystem naturalness and ecological connectivity

| MAIN CONCEPT            | RELATED CONCEPTS                                              | ADOPTED DEFINITION AND KEY REFERENCES                                                                                                                                                                                                                                                                                                                                                                                                                                                                                                                                                                                                                                                                                                                                                                                                                                                                                                                                                                                                                                                                                                                                                                                                                                                                |
|-------------------------|---------------------------------------------------------------|------------------------------------------------------------------------------------------------------------------------------------------------------------------------------------------------------------------------------------------------------------------------------------------------------------------------------------------------------------------------------------------------------------------------------------------------------------------------------------------------------------------------------------------------------------------------------------------------------------------------------------------------------------------------------------------------------------------------------------------------------------------------------------------------------------------------------------------------------------------------------------------------------------------------------------------------------------------------------------------------------------------------------------------------------------------------------------------------------------------------------------------------------------------------------------------------------------------------------------------------------------------------------------------------------|
| Ecosystem naturalness   | Vegetation condition, landscape conservation status/condition | <p><i>Naturalness</i> is a characteristic associated to the physical and biological integrity of ecosystems, together with ecosystem service capacity, stability and resilience [Andreasen et al., 2001], and can be measured in a variety of ways.</p> <p>Specifically, assuming that vegetation cover types represent the ideal spatial proxy for ecosystems [Capotorti et al., 2015], vegetation condition can be considered a proxy for the overall naturalness of ecosystems [Ferrari et al., 2008].</p> <p>In turn, vegetation condition can be assessed in terms of species composition and vegetation structure with respect to a reference baseline, such as the potential natural vegetation at the occurring site (<i>i.e.</i> the plant community that would establish if the successional sequence was completed without human disturbance) [Farris et al., 2010]. Therefore, the more a real vegetation community compositional and structural features are similar to those of an undisturbed one, the higher is its naturalness degree.</p> <p>Once determined, the naturalness of ecosystems at the patch or class level can be adopted as a basic indicator for assessing the structural conservation status (or structural condition) of landscapes [Capotorti et al., 2015].</p> |
| Ecological connectivity | Landscape fragmentation                                       | <p><i>Ecological connectivity</i> represents an emergent property of landscapes, which allows populations, communities and ecological processes to be maintained in a land mosaics disturbed and fragmented by human activities by means of ecological corridors, stepping stones and/or habitat mosaics [Bennett, 1999; Zeller et al., 2020].</p> <p>It can be measured in both structural and functional terms, with <i>structural connectivity</i> mainly depending upon the spatial arrangement of the elements in the land mosaic (<i>i.e.</i> upon the physical continuity of landscape elements or habitats for a single species or for species assemblages). On the other hand, <i>functional connectivity</i> is determined by the structural one, but also depends upon the quality of available habitats as well as on the behavior and dispersal abilities of single species [Bennett et al., 2006; Calabrese &amp; Fagan, 2004].</p>                                                                                                                                                                                                                                                                                                                                                    |

## References [with respective number in the reference list of the main text]

- Andreasen, J.K; O'Neill, R.V; Noss, R; Slosser, N.C. Considerations for the development of a terrestrial index of ecological integrity. *Ecol. Indic.* **2001**, *1*, 21–35. [29]
- Bennett, A.F. *Linkages in the Landscape: The Role of Corridors and Connectivity in Wildlife Conservation*; International Union for Conservation of Nature and Natural Resources: Cambridge, UK, 1999. [32]

Bennett, A. F.; Radford, J. Q.; Haslem, A. Properties of land mosaics: implications for nature conservation in agricultural environments. *Biol. Conserv.* **2006**, *133*, 250-264. **[5]**

Calabrese, J.M.; Fagan, W.F. A comparison-shopper's guide to connectivity metrics. *Front. Ecol. Environ.* **2004**, *2*, 529–536. **[33]**

Capotorti, G.; Alós Ortí, M.M.; Anzellotti, I.; Azzella, M.M.; Copiz, R.; Mollo, B.; Zavattero, L. The MAES process in Italy: Contribution of vegetation science to implementation of European Biodiversity Strategy to 2020. *Plant Biosyst.* **2015**, *149*, 949–953. **[37]**

Farris, E.; Filibeck, G.; Marignani, M.; Rosati, L. The power of potential natural vegetation (and of spatial-temporal scale), a response to Carrión & Fernández (2009). *J. Biogeogr.* **2010**, *37*, 2211–2213. **[31]**

Ferrari, C.; Pezzi, G.; Diani, L.; Corazza, M. Evaluating Landscape Quality with Vegetation Naturalness Maps: An Index and Some Inferences. *Appl. Veg. Sci.* **2008**, *11*, 243–250. **[30]**

Zeller, A. K.; Lewison, R.; Fletcher, J. R.; Tulbure, G. M.; Jennings, M. Understanding the Importance of Dynamic Landscape Connectivity. *Land* **2020**, *9*, 303. **[10]**
